# Supplementary material for: Very large scale characterization of graphene mechanical devices using a colorimetry technique
Source: Royal Society of Chemistry journal article supplement (doi:10.1039/c7nr01766a), 2017-01-01
Supplement: c7nr01766a2.xlsx [file c7nr01766a2.xlsx]

## Sheet: Sheet1
	Cavity depth=	285nm				570nm				632nm				1140nm				632nm with gold
Diameter (um)		Membranes	Cavities	Yield		Membranes	Cavities	Yield		Membranes	Cavities	Yield		Membranes	Cavities	Yield		Membranes	Cavities	Yield
20		0	16	0		0	36	0		0	36	0		0	36	0		1	36	0.0277778
15		0	64	0		2	64	0.03125		3	64	0.046875		3	64	0.046875		7	64	0.109375
14		1	64	0.015625		4	64	0.0625		2	64	0.03125		6	64	0.09375		8	64	0.125
13		0	64	0		4	64	0.0625		3	48	0.0625		6	64	0.09375		8	64	0.125
12		2	100	0.02		17	100	0.17		9	86	0.104651		30	100	0.3		14	100	0.14
11		7	100	0.07		20	100	0.2		16	100	0.16		34	100	0.34		17	100	0.17
10		10	143	0.0699301		22	144	0.152778		19	144	0.131944		27	144	0.1875		33	144	0.229167
9		0	195	0		38	196	0.193878		57	196	0.290816		63	196	0.321429		73	196	0.372449
8		0	0			49	196	0.25		61	196	0.311224		60	196	0.306122		61	195	0.312821
7		0	138	0		57	196	0.290816		66	196	0.336735		96	196	0.489796		72	196	0.367347
6		27	215	0.125581		90	256	0.351562		47	112	0.419643		156	256	0.609375		114	256	0.445312
5		54	321	0.168224		220	400	0.55		-	98			274	400	0.685		194	400	0.485
4		39	365	0.106849		262	400	0.655		53	98	0.540816		286	400	0.715		289	400	0.7225
3		149	400	0.3725		345	400	0.8625		287	372	0.771505		326	400	0.815		301	400	0.7525
2		180	400	0.45		352	400	0.88		169	200	0.845		325	362	0.89779		88	100	0.88
