# Supplementary material for: Very large scale characterization of graphene mechanical devices using a colorimetry technique
Source: Royal Society of Chemistry journal article supplement (doi:10.1039/c7nr01766a), 2017-01-01
Supplement: c7nr01766a3.xlsx [file c7nr01766a3.xlsx]

## Sheet: Sheet1
	Cavity depth=	285nm				570nm				570nm				632nm				1140nm				632nm with gold
Diameter (um)		Membranes	Cavities	Yield		Membranes	Cavities	Yield		Membranes	Cavities	Yield		Membranes	Cavities	Yield		Membranes	Cavities	Yield		Membranes	Cavities	Yield
20		5	36	0.138889		23	36	0.638889		16	36	0.444444		29	35	0.828571		7	36	0.194444		27	36	0.75
15		24	64	0.375		46	64	0.71875		36	64	0.5625		57	64	0.890625		32	64	0.5		55	64	0.859375
14		34	64	0.53125		39	64	0.609375		35	63	0.555556		47	63	0.746032		22	64	0.34375		60	64	0.9375
13		35	64	0.546875		44	64	0.6875		34	64	0.53125		57	64	0.890625		31	64	0.484375		55	64	0.859375
12		58	99	0.585859		52	100	0.52		53	100	0.53		87	100	0.87		62	100	0.62		94	100	0.94
11		46	100	0.46		65	100	0.65		56	100	0.56		93	100	0.93		65	100	0.65		95	100	0.95
10		81	144	0.5625		112	144	0.777778		110	144	0.763889		138	143	0.965035		110	144	0.763889		126	143	0.881119
9		65	193	0.336788		174	196	0.887755		164	189	0.867725		195	196	0.994898		146	196	0.744898		189	196	0.964286
8		113	196	0.576531		185	196	0.943878		162	196	0.826531		188	191	0.984293		156	196	0.795918		194	196	0.989796
7		130	196	0.663265		189	196	0.964286		181	196	0.923469		194	196	0.989796		150	196	0.765306		193	196	0.984694
6		199	256	0.777344		247	256	0.964844		245	256	0.957031		256	256	1		216	256	0.84375		253	256	0.988281
5		347	400	0.8675		397	400	0.9925		386	400	0.965		395	400	0.9875		374	400	0.935		399	400	0.9975
4		345	400	0.8625		397	400	0.9925		394	400	0.985		399	400	0.9975		384	400	0.96		398	400	0.995
3		370	400	0.925		395	400	0.9875		390	398	0.979899		400	400	1		382	400	0.955		400	400	1
2		400	400	1		400	400	1		400	400	1		400	400	1		390	400	0.975		400	400	1
